# Supplementary material for: Fabrication of an electrochemical aptasensor for the determination of sarcosine based on synthesized CuCo2O4 nanosheets
Source: Royal Society of Chemistry journal article supplement (doi:10.1039/d3ay01149f), 2023-01-01
Supplement: d3ay01149f1.pdf [file d3ay01149f1.pdf]

## Supplementary Material

### **Fabrication of an electrochemical aptasensor for the determination of sarcosine based on synthesized $\text{CuCo}_2\text{O}_4$ nanosheets**

Somayeh Farokhi, Mahmoud Roushani\*, Zahra Saedi

*Department of Chemistry, Faculty of Sciences, Ilam University, Ilam, P. O. BOX. 69315-516,*

*Iran*

\* Corresponding author :Tel/fax: +98 841 2227022

E-mail address: [m.roushani@ilam.ac.ir](mailto:m.roushani@ilam.ac.ir) and [mahmoudroushani@yahoo.com](mailto:mahmoudroushani@yahoo.com) (M. Roushani)

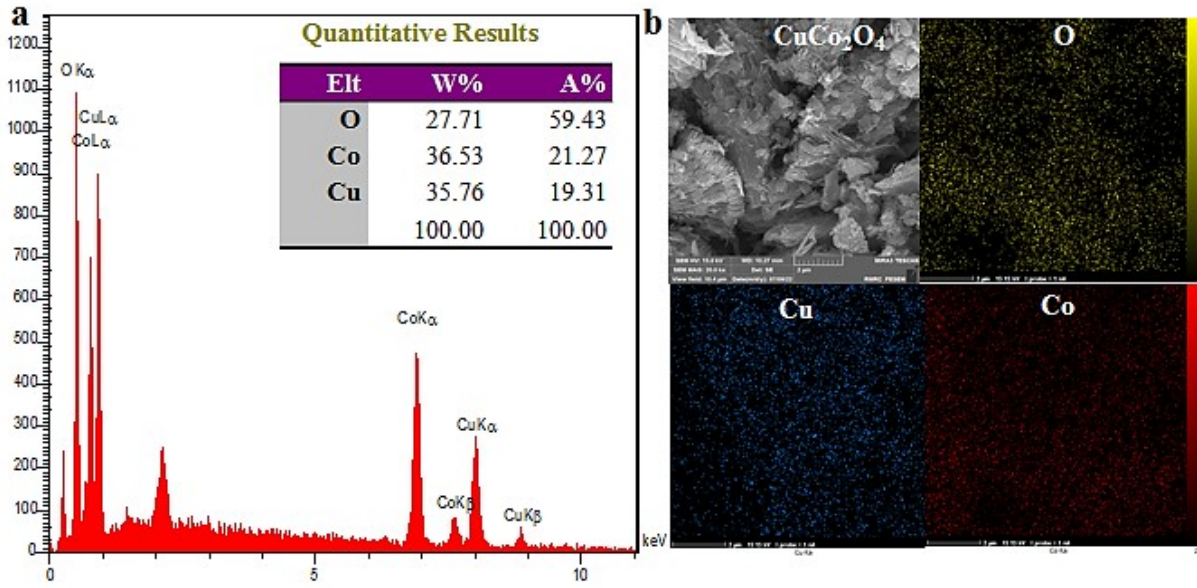

**Fig. S1.** (a) the EDX spectrum recorded for the synthesized  $\text{CuCo}_2\text{O}_4$  NSs, and (b) EDX mapping images related to  $\text{CuCo}_2\text{O}_4$  NSs

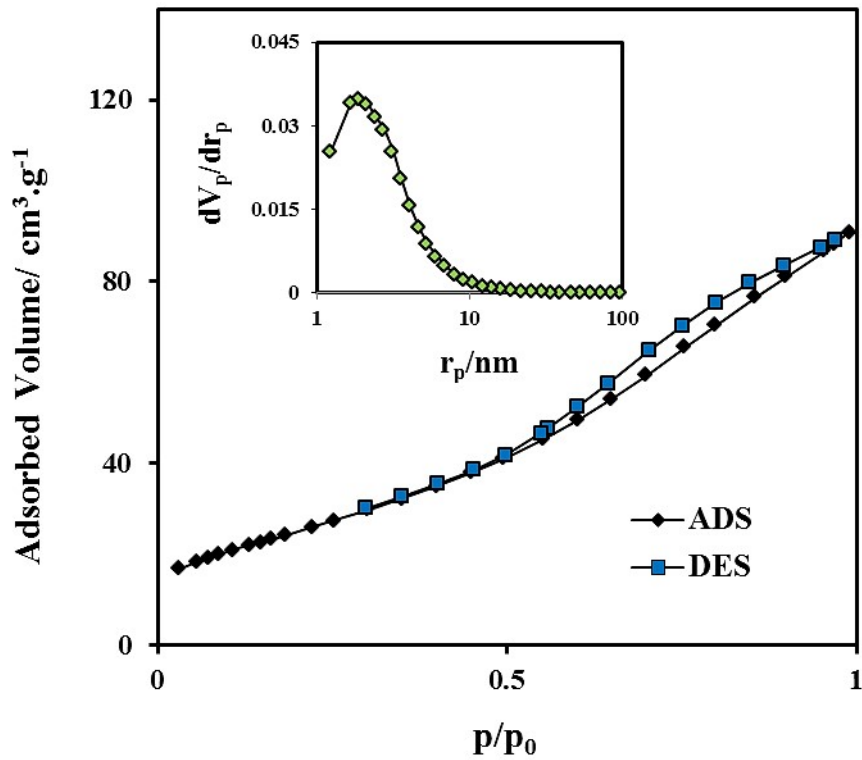

**Fig. S2.** The obtained  $\text{N}_2$  adsorption-desorption isotherms of the  $\text{CuCo}_2\text{O}_4$  NSs

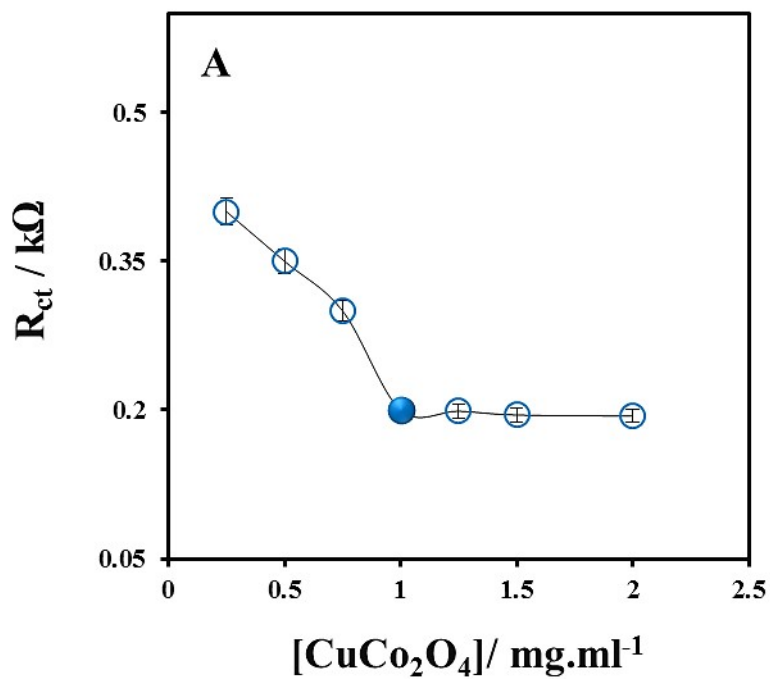

Fig. S3. A bar chart related to the results of optimizing the CuCo<sub>2</sub>O<sub>4</sub>NSs concentration in the fabrication of SRN aptasensor

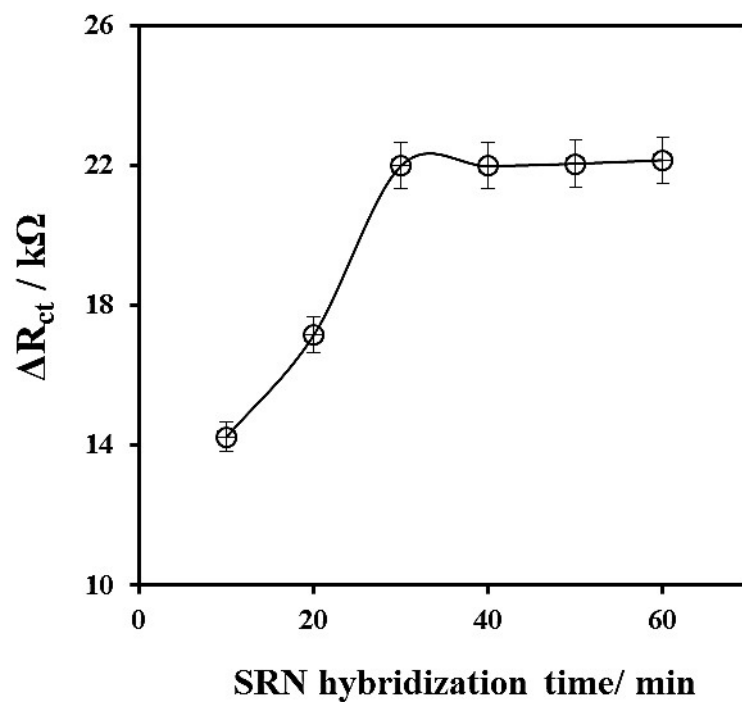

Fig. S4. The EIS response curve of the electrochemical biosensor at different times of SRN hybridization

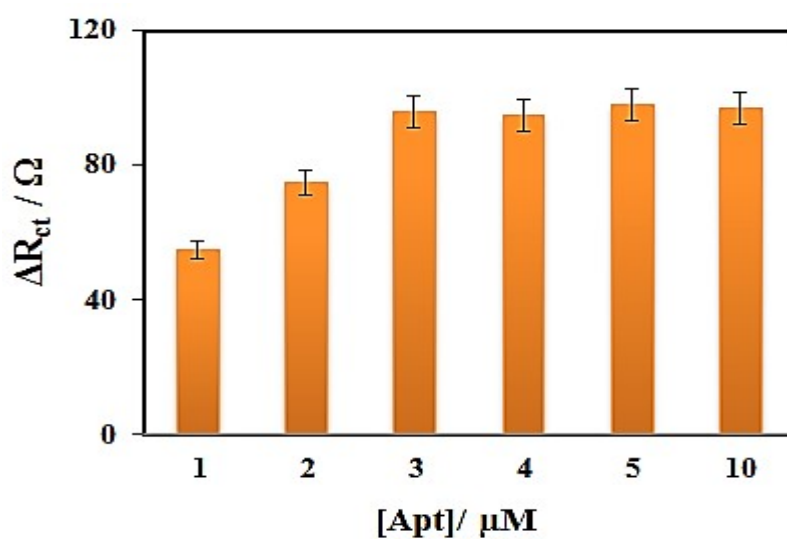

Fig. S5. Bar chart of  $\Delta R_{ct}$  at different concentrations of aptamer

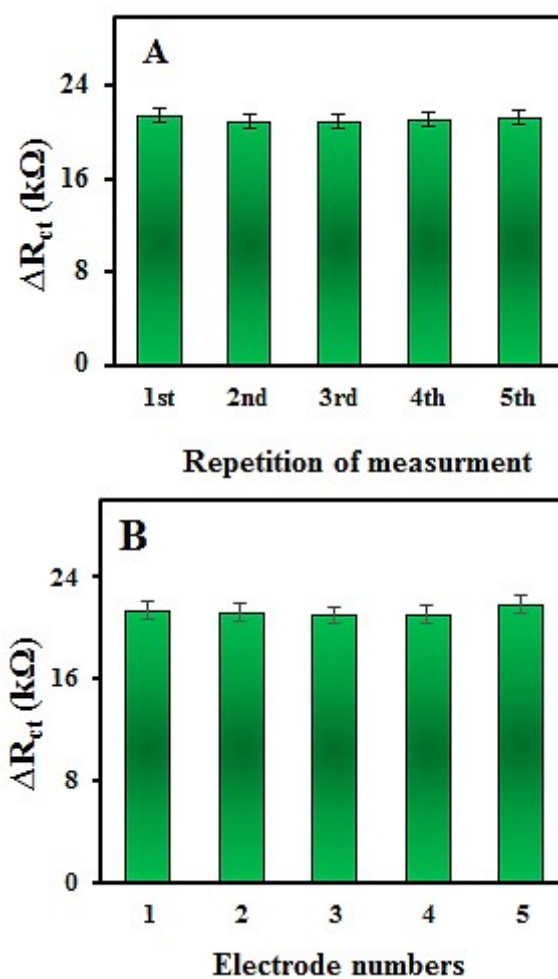

Fig. S6. (A) The resulting bar chart of the five repetitive measurements of SRN using the developed biosensor, and (B) the resulting bar chart for the EIS responses of the five developed biosensors with a same method

**Table S1.** A comparison of the present study with earlier electrochemical studies for SRN detection

| Electrode materials                              | LOD          | Linearity           | Refs.      |
|--------------------------------------------------|--------------|---------------------|------------|
| Pt@ZIF8 <sup>a</sup> /Nafion/GCE                 | 1.06 $\mu$ M | 5-30 $\mu$ M        | 1          |
| SOx <sup>b</sup> /SPE <sup>c</sup>               | 16 nM        | 10-100 nM           | 2          |
| SOx/CHIT/CuNPs/c-MWCNT/AuE <sup>d</sup>          | 0.10 pM      | 0.1-100 $\mu$ M     | 3          |
| MIP <sup>e</sup> / CPE <sup>f</sup>              | 0.38 $\mu$ M | 5.0 $\mu$ M- 1.1 mM | 4          |
| Nano anti- sarcosine antibody -GFOX <sup>g</sup> | 3.34 pM      | 10 pM- 10 $\mu$ M   | 5          |
| Sarcosine-imprinted MIP/SPAu <sup>h</sup>        | 8.5 nM       | 0.011- 17.9 $\mu$ M | 6          |
| Apt/ CuCo <sub>2</sub> O <sub>4</sub> / GCE      | 350 fM       | 1pM – 8 $\mu$ M     | This study |

<sup>a</sup> Nano platinum@ Zeolitic imidazolate framework-8 (ZIF8)

<sup>b</sup> Sarcosine oxidase

<sup>c</sup> Carbon screen printed electrode

<sup>d</sup> Sarcosine oxidase/ chitosan/ copper nanoparticles/ carboxylated multi-walled carbon nanotubes/ gold electrode

<sup>e</sup> Molecularly imprinted polymer (MIP)

<sup>f</sup> Carbon paste electrode (CPE)

<sup>g</sup> Graphene oxide

<sup>h</sup> Gold nanoparticles/ screen-printed carbon electrodes (SPCEs)

- [1] Yang H, Wang J, Yang C, Zhao X, Xie S, Ge Z (2018) Nano Pt@ ZIF8 modified electrode and its application to detect sarcosine. *J. Electrochem. Soc.* 165(5):H247- H250.
- [2] Rebelo TS, Pereira CM, Sales MG, Noronha JP, Costa-Rodrigues J, Silva F, Fernandes MH (2014) Sarcosine oxidase composite screen-printed electrode for sarcosine determination in biological samples. *Anal. chim. acta.* 850: 26-32.
- [3] Narwal V, Kumar P, Joon P, Pundir CS (2018) Fabrication of an amperometric sarcosine biosensor based on sarcosine oxidase/chitosan/CuNPs/c-MWCNT/Au electrode for detection of prostate cancer, *Enzyme Microb. Technol*, 113: 44-51.
- [4] Sheydaei O, Khajehsharifi H, Rajabi HR (2020) Rapid and selective diagnose of Sarcosine in urine samples as prostate cancer biomarker by mesoporous imprinted polymeric nanobeads modified electrode. *Sens. Actuators B Chem.* 309 127559.
- [5] Altunkok N, Unluer OB, Ozkutuk EB, Ersoz A (2021) Development of potentiometric biosensor for diagnosis of prostate cancer, *J. Mater. Sci. Eng. B.* 263: 114789.
- [6] Nguy TP, Van Phi T, Tram DT, Eersels K, Wagner P, Lien TT (2017) Development of an impedimetric sensor for the label-free detection of the amino acid sarcosine with molecularly imprinted polymer receptors. *Sens. Actuators B Chem.* 246: 461-470.
